# Supplementary material for: Efficient photocatalytic hydrogen evolution of g-C3N4/Vs-SnS2/CdS through a sulfur vacancy-rich SnS2 induced charge storage effect
Source: Royal Society of Chemistry journal article supplement (doi:10.1039/d4qi00602j), 2024-01-01
Supplement: d4qi00602j1.pdf [file d4qi00602j1.pdf]

**Efficient Photocatalytic Hydrogen Evolution of g-C<sub>3</sub>N<sub>4</sub>/Vs-SnS<sub>2</sub>/CdS  
through Sulfur Vacancies-rich SnS<sub>2</sub> induced Charge Storage Effect**

*Fangyuan Xing, Junyan Li, Chengzhi Wang, Shaohua Jin, Haibo Jin and Jingbo Li\**

F. Xing, J. Li, C. Wang, S.H. Jin, H.B. Jin, J.Bo. Li

Beijing Key Laboratory of Construction Tailorable Advanced Functional Materials  
and Green Applications, School of Materials Science and Engineering, Beijing  
Institute of Technology, Beijing 100081, China

E-mail: [lijb@bit.edu.cn](mailto:lijb@bit.edu.cn)

## **Experimental Section**

### **Photoelectrochemical measurements**

The photoelectrochemical performance was evaluated in a standard three-electrode configuration using an electrochemical workstation (CHI660D, Chenhua, China). A platinum sheet as the counter electrode, and an Ag/AgCl reference electrode. The working electrodes were prepared by the following steps: 6 mg sample was mixed with 40  $\mu$ L nafion and 1mL ethanol by ultrasonic treatment for 10 min to obtain a slurry. Then, the above solution was dropped onto the precleaned 1.5 cm $\times$ 1 cm ITO glass electrode surface, followed by air-drying before measurement. Na<sub>2</sub>SO<sub>4</sub> (0.5 M) solution was used as the electrolyte.

### **Evaluation of photocatalytic activity**

The photocatalytic overall water splitting reaction was carried out in a Pyrex top-irradiation reaction vessel connected to a glass closed gas system (Perfect Light). 3 wt% Pt as co-catalysts were loaded on the photocatalysts by in situ photo-deposition method using H<sub>2</sub>PtCl<sub>6</sub>. And 50 mg photocatalysts were dispersed in 80 ml distilled water and 20ml triethanolamine. The reaction solution was kept at 10 °C by recirculating cooling water system, then it was evacuated several times to remove air completely. And a 300W Xe lamp was used as the light source. The amounts of gases produced were measured by gas chromatography equipped with a thermal conductive detector (TCD) and a 5 Å molecular sieve column, using argon as the carrier gas.

### **Characterization**

The structure and morphology of the prepared samples were characterized by X-ray

diffraction (XRD, Cu-K $\alpha$ , X'pert Pro, PANalytical B. V., Almelo, Netherlands), scanning electron microscopy (SEM, HITACHI S-3500N, Japan) and transmission electron microscopy (TEM, FEI Tecnai G2 F20 S-TWIN). UV-vis diffuse reflectance spectra (UV-vis DRS) of the samples were measured by an UV-vis spectrophotometer (HITACHI U-3310, Hitachi Co., JPN) with an integrating sphere assembly, using BaSO<sub>4</sub> as the reflectance sample. BET surface area measurements were recorded by H<sub>2</sub>O adsorption using a Micrometrics (ASAP2460) surface area analyzer. The electron paramagnetic resonance (EPR) measurement was carried out on a Bruker EMX PLUS spectrometer. The PL was obtained by a FLS1000 system (Edinburgh Instruments, UK). The IR spectra was obtained by the Thermo Scientific Nicolet™ iS™ 50 Spectrometer. The Contact angle test was obtained by JY-82C. The Surface photovoltage (SPV) measurement was carried out on a Surface photovoltage test system (CEL-SPS1000). The transient absorption measurement (TA) was measured by Vitaro-Legend Elite-Helios.

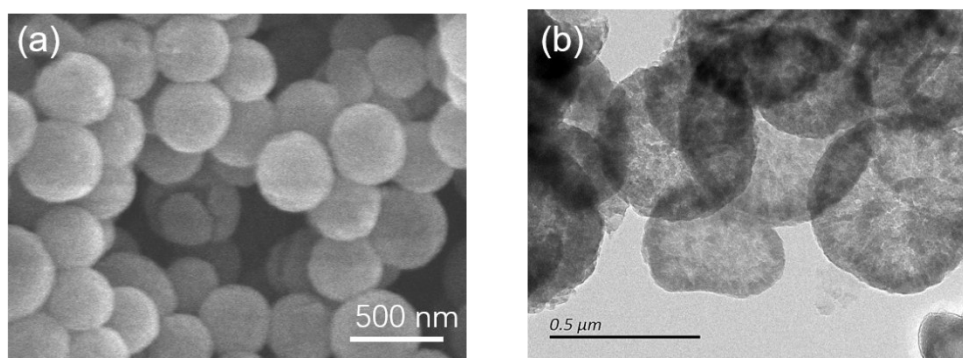

**Figure S1** SEM image (a) and TEM image (b) of g-C<sub>3</sub>N<sub>4</sub> hollow spheres

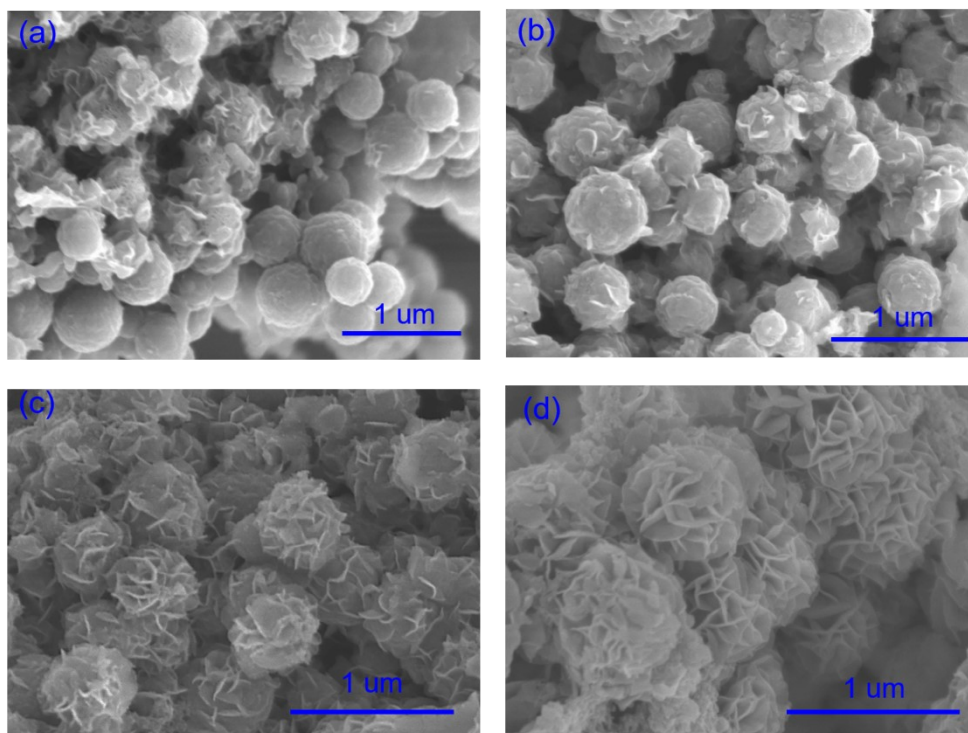

**Figure S2** SEM images of g- C<sub>3</sub>N<sub>4</sub>/SnS<sub>2</sub> loaded with different mass fractions of SnS<sub>2</sub>

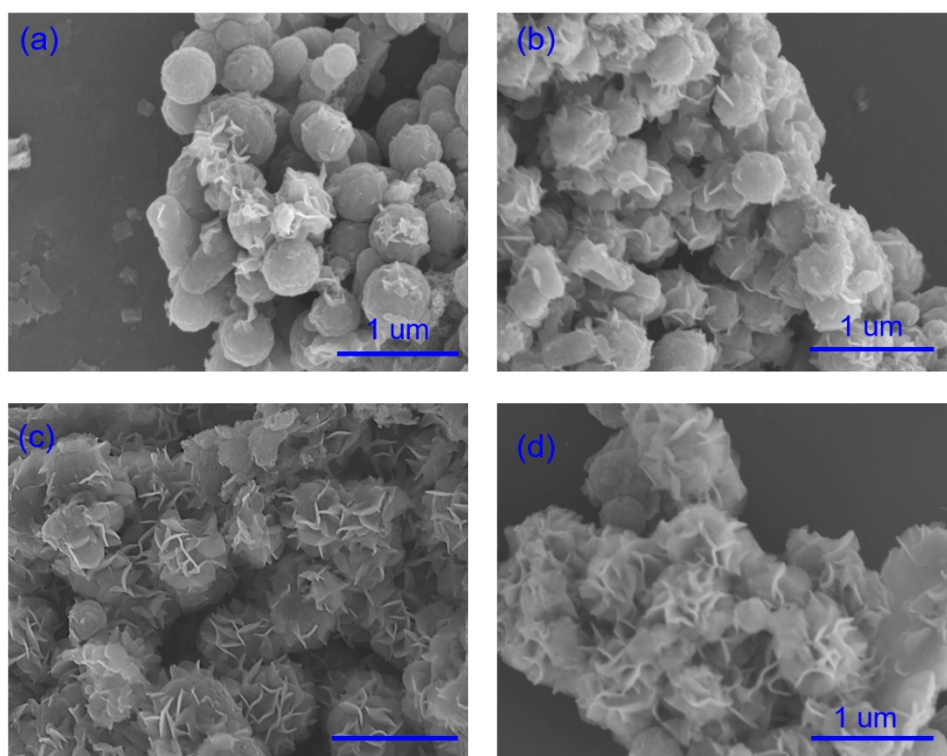

**Figure S3** SEM images of g-C<sub>3</sub>N<sub>4</sub>/Vs-SnS<sub>2</sub> loaded with different mass fractions of SnS<sub>2</sub> (a) 20.3, (b) 25.7, (c) 29.8, and (d) 35.1wt.%

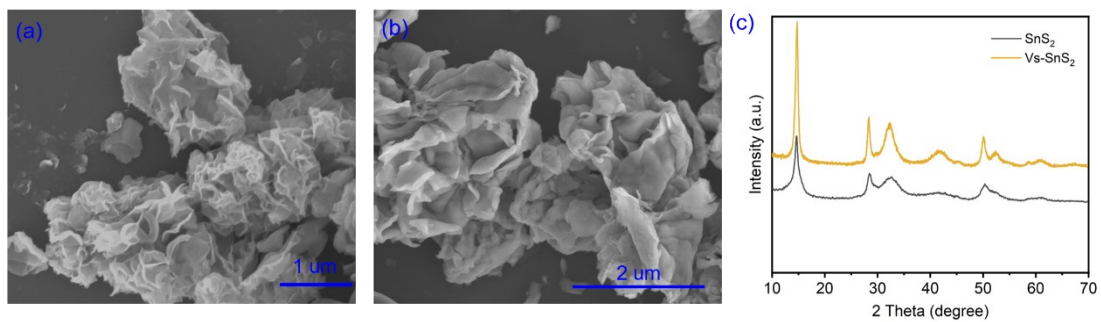

**Figure S4** SEM image of SnS<sub>2</sub> (a) and Vs-SnS<sub>2</sub> (b); XRD pattern of SnS<sub>2</sub> and Vs-SnS<sub>2</sub> (c)

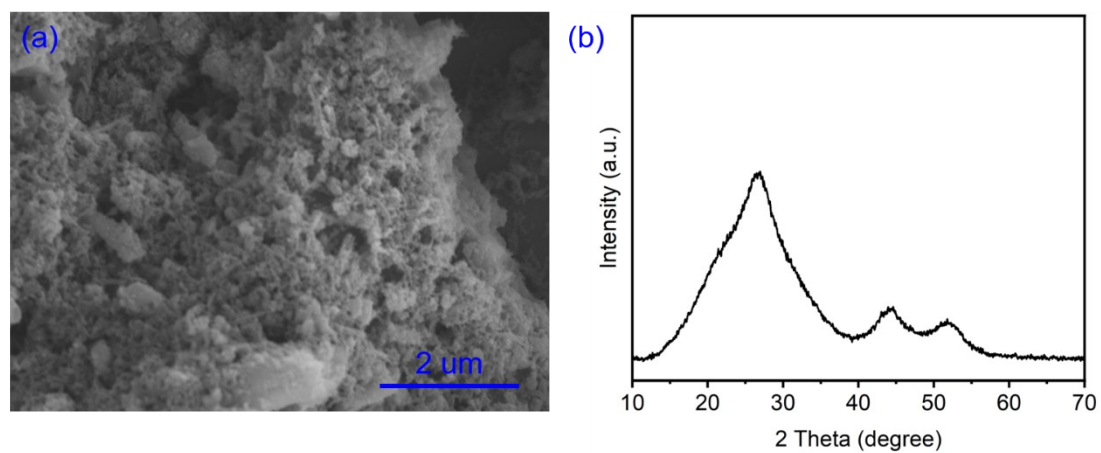

**Figure S5** SEM image (a) and XRD patterns (b) of CdS

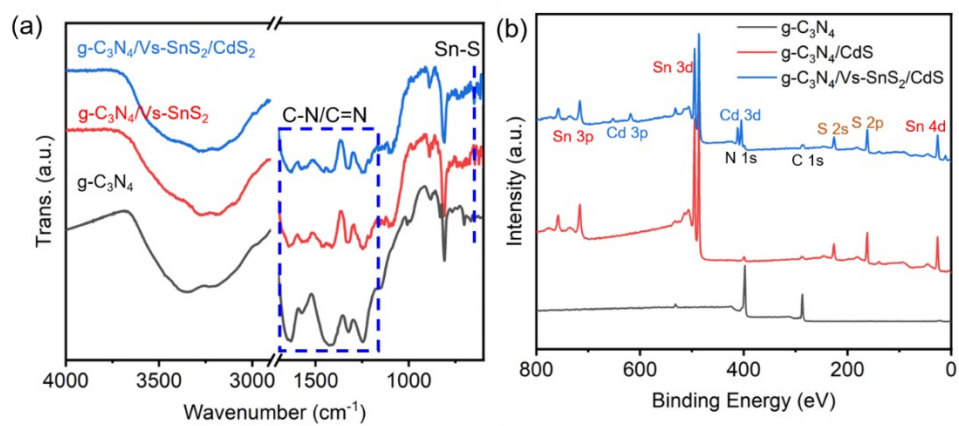

**Figure S6** IR spectra (a) and XPS spectra of samples

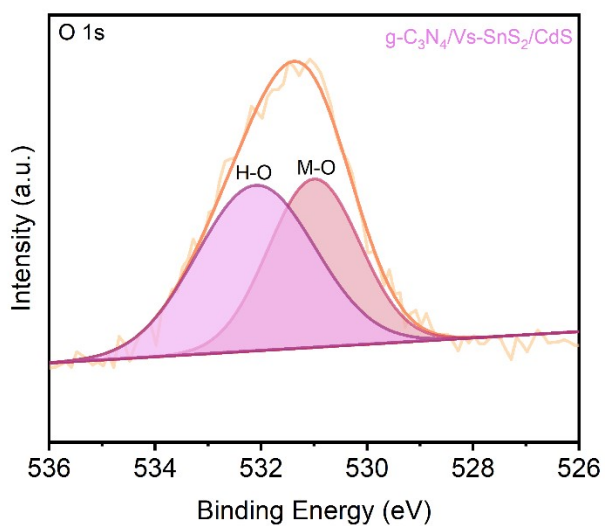

**Figure S7** O 1s core-level XPS spectra of g-C<sub>3</sub>N<sub>4</sub>/Vs-SnS<sub>2</sub>/CdS

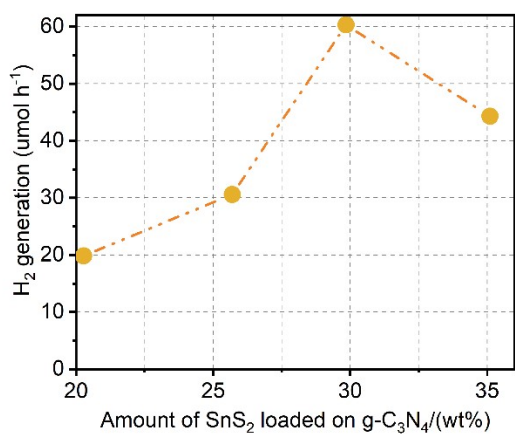

**Figure S8** Photocatalytic H<sub>2</sub> evolution rate under visible light irradiation of g-C<sub>3</sub>N<sub>4</sub>/Vs-SnS<sub>2</sub> photocatalysts with different amount of Vs-SnS<sub>2</sub>.

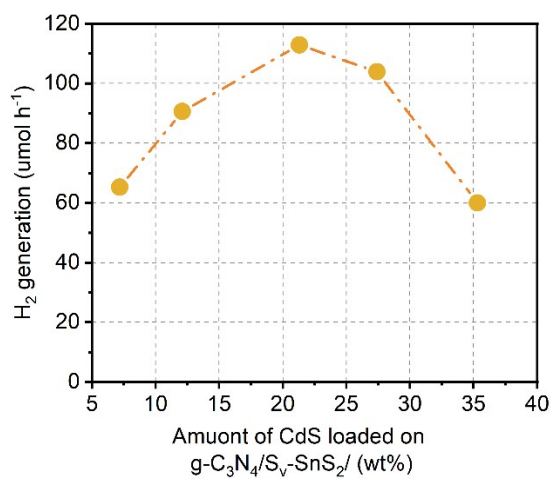

**Figure S9** Photocatalytic H<sub>2</sub> evolution rate under visible light irradiation of g-C<sub>3</sub>N<sub>4</sub>/Vs-SnS<sub>2</sub>/CdS photocatalysts with different amount of CdS.

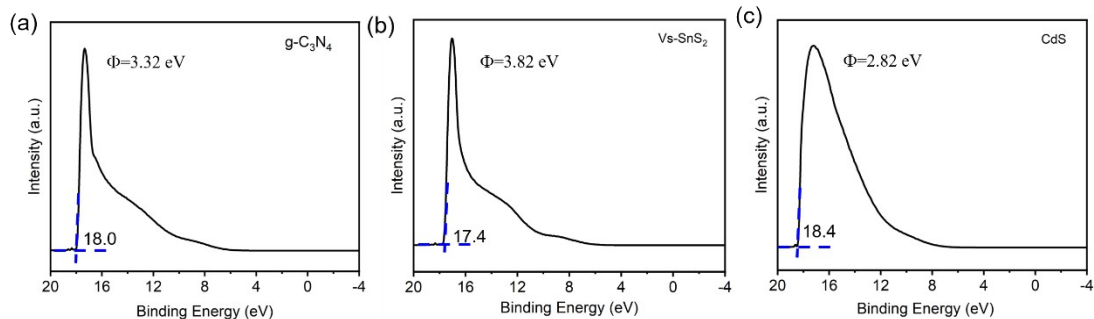

**Figure S10** UPS spectra of g-C<sub>3</sub>N<sub>4</sub> (a), Vs-SnS<sub>2</sub> (b) and CdS (c)

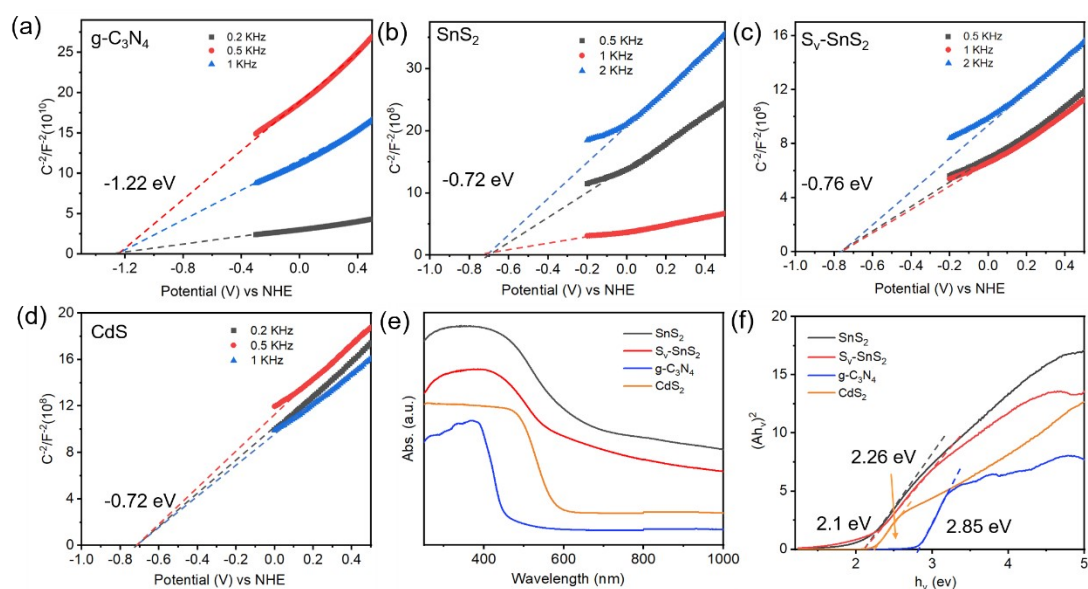

**Figure S11** Band structure. Mott-Schottky (M-S) plot of (a) g-C<sub>3</sub>N<sub>4</sub>, (b) SnS<sub>2</sub>, (c) Sv-SnS<sub>2</sub>, (d) CdS; UV-vis DRS (e) and Kubelka-Munk function vs. the energy of incident light plots (f) of the samples

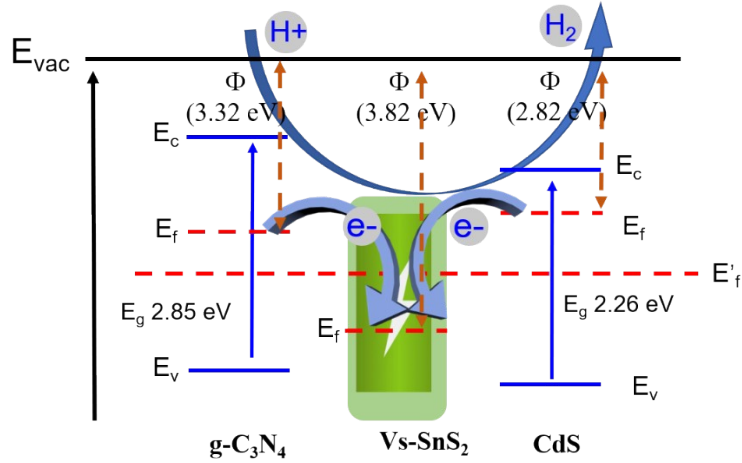

**Figure S12** the energy band structure of  $g\text{-C}_3\text{N}_4/\text{Vs-SnS}_2/\text{CdS}$

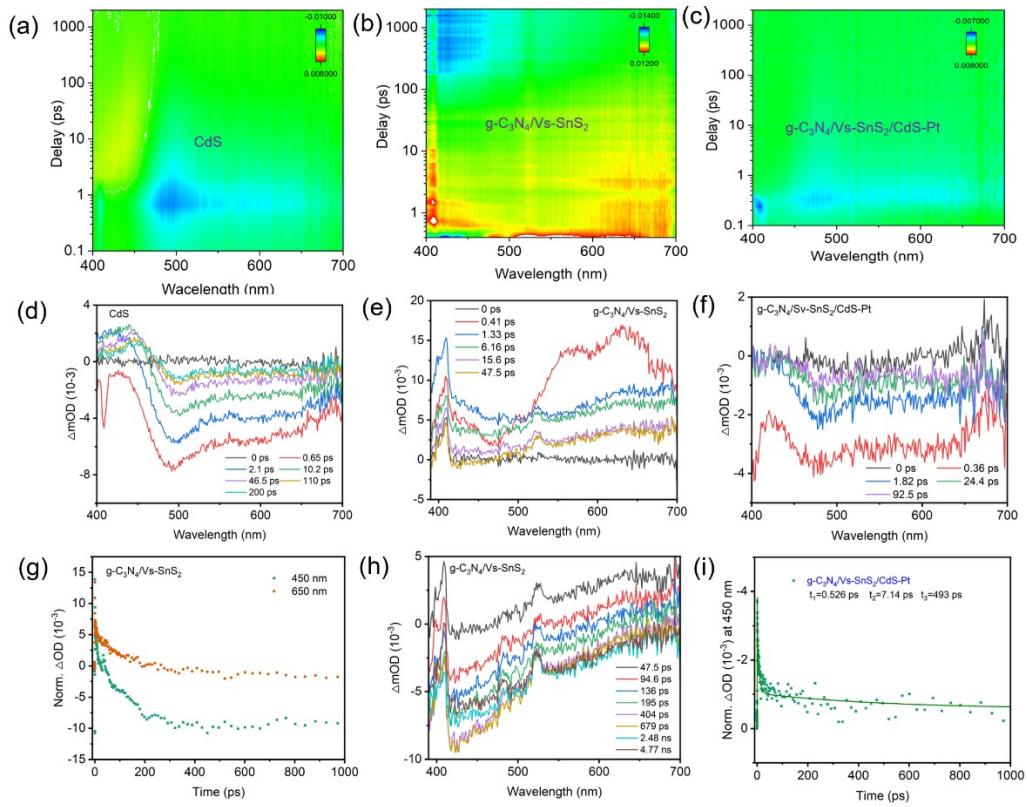

**Figure S13** 2D mapping TA spectra of (a) CdS, (b)  $g\text{-C}_3\text{N}_4/\text{Vs-SnS}_2$ , (c)  $g\text{-C}_3\text{N}_4/\text{Vs-SnS}_2/\text{CdS-Pt}$ ; TA spectra signals of (d) CdS, (e, h)  $g\text{-C}_3\text{N}_4/\text{Vs-SnS}_2$ , (f)  $g\text{-C}_3\text{N}_4/\text{Vs-SnS}_2/\text{CdS-Pt}$  under 360 nm pump; time profiles of normalized TAS for (g)  $g\text{-C}_3\text{N}_4/\text{Vs-SnS}_2$ , (i)  $g\text{-C}_3\text{N}_4/\text{Vs-SnS}_2/\text{CdS-Pt}$



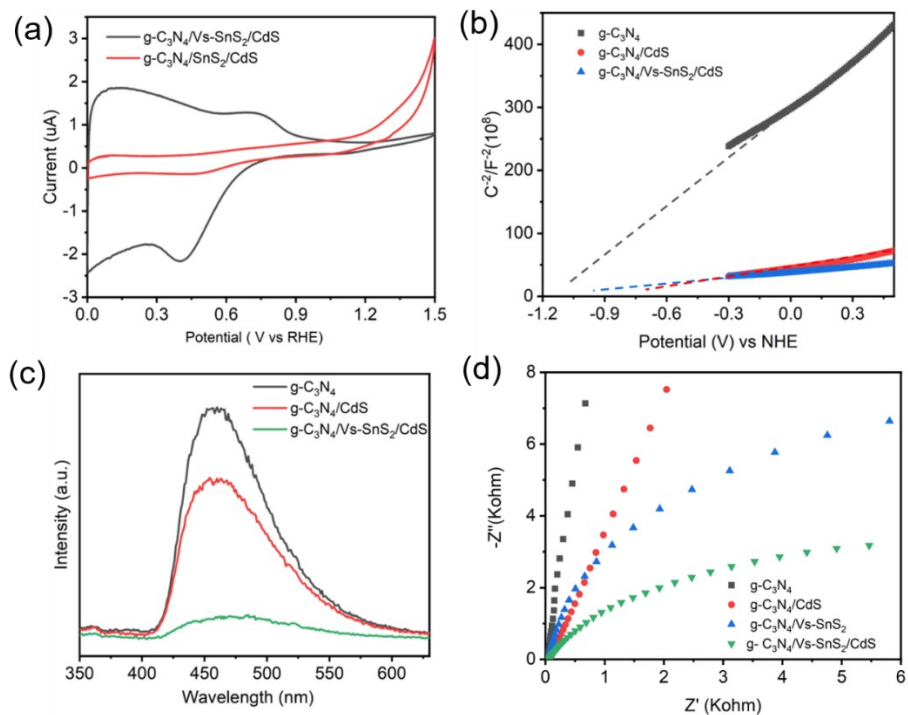

**Figure S14** (a) Cyclic voltammetry (CV) curve; (b) Mott–Schottky plots; (c) Photoluminescence spectrum (PL) spectra of the samples; (d) Electrochemical impedance spectra (EIS) of the samples

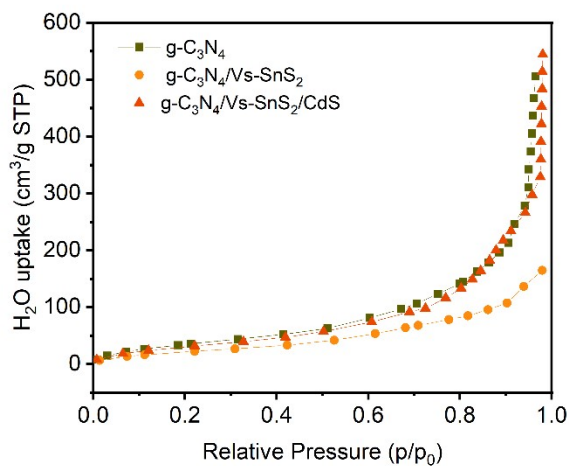

**Figure S15** H<sub>2</sub>O adsorption isotherm
